# Supplementary material
Source: PubMed Central journal article supplement (PMC10306121)
Supplement: NIHMS1909113-supplement-1.pdf [file NIHMS1909113-supplement-1.pdf]

**Supplementary Table 4.** Baseline Characteristics Among Those Who Received Chemoembolization Vs Other Therapy as the First LRT, and the Type of Second Treatment

|                                                                     | Chemoembolization | Other LRT     | <i>P</i> |
|---------------------------------------------------------------------|-------------------|---------------|----------|
| N                                                                   | 15,984            | 8161          |          |
| Median age at listing, <i>y</i> (IQR)                               | 60 (55–64)        | 60 (55–64)    | .12      |
| Sex, male, <i>n</i> (%)                                             | 12,284 (76.9)     | 6348 (77.8)   | .11      |
| Etiology of liver disease, <i>n</i> (%)                             |                   |               | <.01     |
| Alcohol                                                             | 2354 (14.7)       | 1287 (15.8)   |          |
| Hepatitis B                                                         | 1001 (6.3)        | 502 (6.2)     |          |
| Hepatitis C                                                         | 8609 (53.9)       | 4349 (53.3)   |          |
| Metabolic                                                           | 151 (0.9)         | 57 (0.7)      |          |
| NASH                                                                | 1356 (8.5)        | 800 (9.8)     |          |
| Other or not specified                                              | 2513 (15.7)       | 1166 (14.3)   |          |
| Median initial biochemical MELD (IQR)                               | 10 (8–13)         | 10 (8–13)     | .04      |
| Initial Child–Pugh class, <i>n</i> (%)                              |                   |               | <.01     |
| A                                                                   | 7139 (44.7)       | 3916 (48.0)   |          |
| B                                                                   | 6951 (43.5)       | 3298 (40.4)   |          |
| C                                                                   | 1886 (11.8)       | 946 (11.6)    |          |
| Median initial AFP level (IQR)                                      | 10 (5–38)         | 9 (5–29)      | <.01     |
| Median total tumor diameter, <i>cm</i> (initial) (IQR) <sup>a</sup> | 3.3 (2.4–4.5)     | 3.0 (2.3–4.1) | <.01     |
| Median largest tumor, <i>cm</i> (initial) (IQR) <sup>a</sup>        | 2.7 (2.2–3.6)     | 2.5 (2.1–3.3) | <.01     |
| Number of lesions (initial), <i>n</i> (%)                           |                   |               | <.01     |
| 0–1                                                                 | 12,225 (76.5)     | 6668 (81.7)   |          |
| 2                                                                   | 2738 (17.1)       | 1130 (13.8)   |          |
| 3                                                                   | 978 (6.1)         | 347 (4.3)     |          |
| ≥4                                                                  | 43 (0.3)          | 16 (0.2)      |          |
| Initial tumor outside Milan criteria, <i>n</i> (%) <sup>b</sup>     | 1114 (7.0)        | 532 (6.5)     | .20      |
| Median waitlist time, <i>d</i> (IQR)                                | 229 (111–420)     | 246 (123–439) | <.01     |
| Wait time region of initial listing                                 |                   |               | <.01     |
| SWR                                                                 | 3886 (24.3)       | 1871 (22.9)   |          |
| MWR                                                                 | 6938 (43.4)       | 3186 (39.0)   |          |
| LWR                                                                 | 5160 (32.3)       | 3104 (38.0)   |          |
| Number of LRT per patient, <i>n</i> (%)                             |                   |               | <.01     |
| 1                                                                   | 10,553 (66.0)     | 5825 (71.4)   |          |
| 2                                                                   | 3995 (25.0)       | 1750 (21.4)   |          |
| 3                                                                   | 1066 (6.7)        | 434 (5.3)     |          |
| ≥4                                                                  | 370 (2.3)         | 152 (1.9)     |          |
| Outcome, <i>n</i> (%)                                               |                   |               | <.01     |
| Liver transplant                                                    | 12,702 (79.5)     | 6377 (78.1)   |          |
| Waitlist dropout                                                    | 2965 (18.5)       | 1456 (17.8)   |          |
| Still waiting/condition improved                                    | 317 (2.0)         | 328 (4.0)     |          |
| Type of second LRT                                                  |                   |               | <.01     |
| Chemoembolization                                                   | 3592 (22.5)       | 1191 (14.6)   |          |
| Radioembolization                                                   | 255 (1.6)         | 247 (3.0)     |          |
| Thermal ablation                                                    | 1197 (7.5)        | 663 (8.1)     |          |
| Combination                                                         | 74 (0.5)          | 70 (0.9)      |          |
| External beam radiation                                             | 151 (0.9)         | 52 (0.6)      |          |
| Other                                                               | 162 (1.0)         | 113 (1.4)     |          |
| None                                                                | 10,553 (66.0)     | 5825 (71.4)   |          |

AFP,  $\alpha$ -fetoprotein; IQR, interquartile range; LRT, locoregional therapy; LWR, long wait time region; MELD, model for end-stage liver disease; MWR, medium wait time region; NASH, nonalcoholic steatohepatitis; SWR, short wait time region.

<sup>a</sup>Largest of either listing or original tumor size.

<sup>b</sup>Reported either at listing or the original tumor size.

**Supplementary Table 5.** Univariable and Multivariable Competing-Risk Analysis for Time From First to Second Treatment, With Death and Transplant Considered as Competing Risks (N = 23,962)

|                                               | Univariable<br>sHR (95% CI) | Multivariable<br>sHR (95% CI) |
|-----------------------------------------------|-----------------------------|-------------------------------|
| Initial total tumor diameter, <i>cm</i>       | <b>1.09 (1.07–1.10)</b>     | <b>1.08 (1.07–1.09)</b>       |
| Initial tumor number (ref: 0–1)               |                             |                               |
| 2                                             | <b>1.17 (1.10–1.24)</b>     | <b>1.21 (1.14–1.29)</b>       |
| 3                                             | <b>1.13 (1.03–1.25)</b>     | <b>1.11 (1.00–1.23)</b>       |
| ≥4                                            | <b>1.73 (1.22–2.45)</b>     | 1.33 (0.95–1.87)              |
| Initial AFP level (ref: ≤20)                  |                             |                               |
| 21–40                                         | 1.11 (1.03–1.19)            | <b>1.15 (1.07–1.24)</b>       |
| 41–500                                        | 1.05 (0.99–1.11)            | <b>1.11 (1.04–1.17)</b>       |
| 501–1000                                      | 0.89 (0.74–1.06)            | 1.04 (0.86–1.25)              |
| ≥1000                                         | <b>0.78 (0.64–0.94)</b>     | 0.94 (0.78–1.14)              |
| Child–Pugh class (ref: A)                     |                             |                               |
| B                                             | <b>0.81 (0.77–0.85)</b>     | <b>0.88 (0.84–0.92)</b>       |
| C                                             | <b>0.54 (0.49–0.59)</b>     | <b>0.59 (0.54–0.64)</b>       |
| Region of initial listing<br>(ref: SWR)       |                             |                               |
| MWR                                           | <b>1.39 (1.31–1.48)</b>     | <b>1.46 (1.37–1.56)</b>       |
| LWR                                           | <b>1.69 (1.59–1.80)</b>     | <b>1.89 (1.78–2.02)</b>       |
| Type of first LRT<br>(ref: chemoembolization) |                             |                               |
| Radioembolization                             | 1.06 (0.97–1.17)            | <b>0.76 (0.69–0.84)</b>       |
| Thermal ablation                              | 0.72 (0.68–0.77)            | <b>0.75 (0.71–0.80)</b>       |
| Combination                                   | 0.59 (0.51–0.67)            | <b>0.54 (0.48–0.62)</b>       |
| External beam radiation                       | 0.80 (0.61–1.06)            | <b>0.67 (0.50–0.89)</b>       |
| Other                                         | 1.05 (0.92–1.21)            | <b>1.18 (1.03–1.35)</b>       |
| Listing era (ref: 2003–2006)                  |                             |                               |
| 2007–2010                                     | 1.61 (1.44–1.80)            | <b>1.60 (1.43–1.80)</b>       |
| 2011–2014                                     | 2.51 (2.26–2.80)            | <b>2.63 (2.36–2.92)</b>       |
| 2015–2018                                     | 3.03 (2.73–3.36)            | <b>3.39 (3.04–3.77)</b>       |

AFP,  $\alpha$ -fetoprotein; LRT, locoregional therapy; LWR, long wait time region; MWR, medium wait time region; sHR, subhazard ratio; SWR, short wait time region.

Bold values indicate statistical significance.
