# Supplementary material
Source: PubMed Central journal article supplement (PMC10306121)

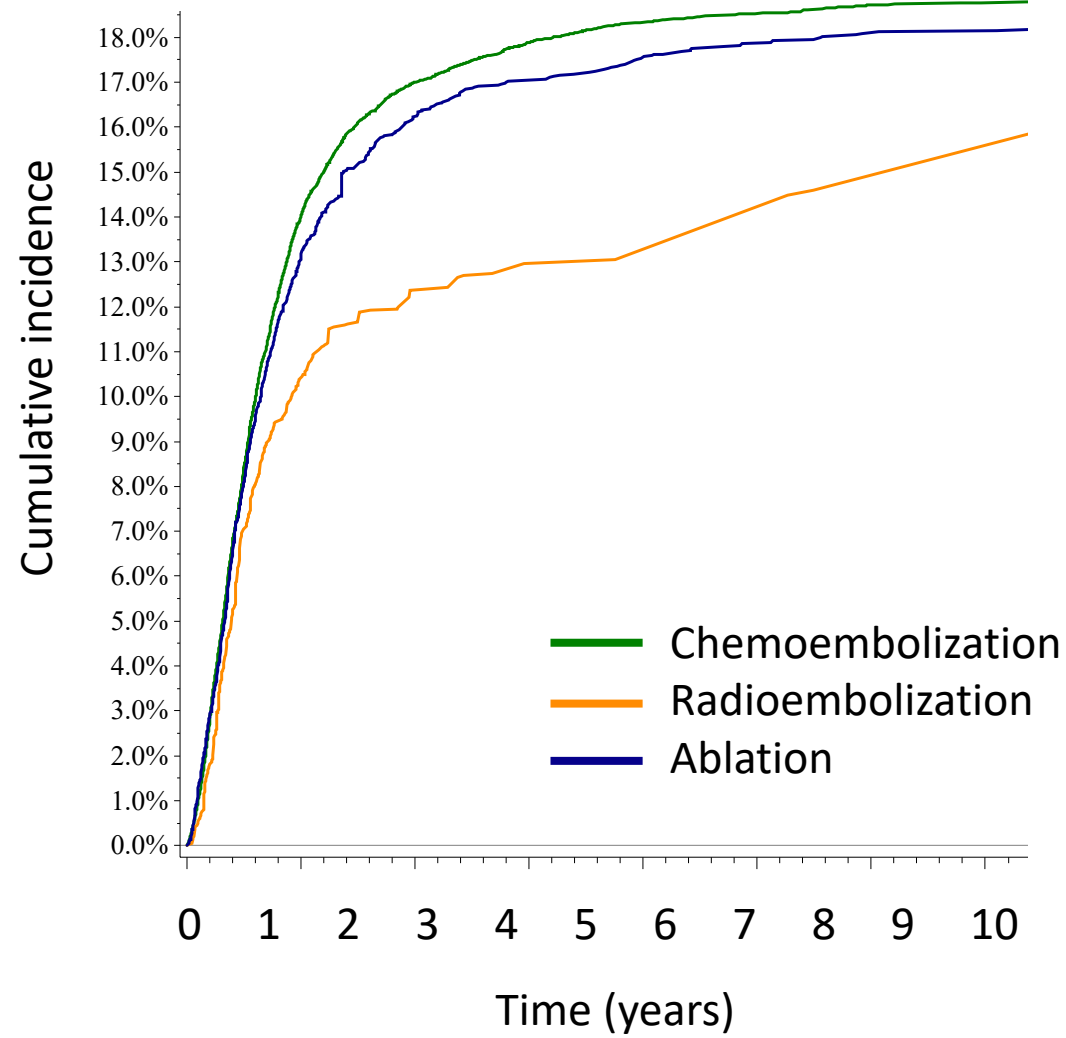

Supplement: NIHMS1909113-supplement-Supplementary_Figure_1.pdf [file NIHMS1909113-supplement-Supplementary_Figure_1.pdf]
